# Supplementary material for: Cardiovascular Disease in Latin American Patients with Systemic Lupus Erythematosus: A Cross-Sectional Study and a Systematic Review
Source: Autoimmune Dis. 2013 Nov 3;2013:794383. doi: 10.1155/2013/794383 (PMC3835818; doi:10.1155/2013/794383)
Supplement: Supplementary file 1 — The Supplementary Material enclose the total description of the systematic literature review, organized by country, author, and year. In this table are all data regarding to type of study, evidence level and contains the prevalence found and their associations with traditional and non–traditional risk factors for CVD in patients with SLE in Latin America. [file 794383.f1.xlsx]

## Sheet: Hoja1
Ref.	Country	Author	Year	Type of Study	Level of evidence (Oxford)	Sample	Prevalence of CVD in SLE (%)	Traditional Risk Factors for CVD (%)	Non-Traditional Risk Factors for CVD (%)			Subphenotype of CVD described (%)	Conclusion
									Genetic	SLE-Related*	Others
[88]	Argentina	Finkielman S, et al.	1969	Cross-sectional	4	54	44	N/A	N/A	GC, LN (62).	N/A	Hypertension (44), CHF (25).	LN and use of GC are associated with CVD in Argentinean SLE patients.
[89]		Bellomio V, et al.	2000	Cohort	2	366	40	Dyslipidemia (20), Hypertension (40).	N/A	N/A	N/A	Hypertension (40), CHF (13).	The main risk factors for death in SLE were heart involvement. This was influenced by hypertension and dyslipidemia.
[14]		Pons-Estel BA, et al¥.	2004	Inception Cohort	2	1,214 (All Hispanics)	26.9	N/A	Ancestry: White (41.8), Mestizo (44.2) and African-LA (12.5).	N/A	N/A	Hypertension (26.9), MI (3), Stroke (2.8), Thrombosis (5.6).	There are several differences regarding clinical (including CVD), prognostic, socioeconomic, educational, and access to medical care features in LA lupus patients.
[41]		Onetti L, et al¶.	2005	Case-Control	3	44/24	79.5	Hyperhomocysteinemia (61.4).	N/A	Polyautoimmunity (APS) (27.27).	N/A	Thrombotic events (79.5)	The presence of APS and hyperhomocysteinemia were risk factors for thrombotic events in Argentinian SLE patients.
[90]		Bellomio V, et al.	2009	Case-Control	3	147/119	29.2	MetS (40).	N/A	N/A	N/A	Hypertension (29.2).	Patients with lupus had higher MetS and hypertension prevalence than controls with non-inflammatory disorders.
[44]	Brazil	Bastos CJ, et al.	1992	Cross-sectional	4	29	37.9	N/A	Renal disease (37).	N/A	N/A	Hypertension (37.9), Arrhytmias (3.4), CHF (27.5).	CVD in SLE is multifactorial and contributes to mortality in Brazilian patients with SLE.
[45]		Chahade WH, et al.	1995	Cohort	2	248	27	N/A	N/A	N/A	N/A	Hypertension (27), Arterial thrombosis (10), Venous thrombosis (0.2).	The main CVD present in Brazilian population with SLE was hypertension.
[46]		Alves LJ, et al.	1997	Case-Control	3	16/14/10	75	N/A	N/A	High disease activity, aCL (68.7)	N/A	Arrythmias, LVDD, CHF.	Myocardial disease was the most frequent heart involvement active SLE, associated with aCL positive.
[47]		Borba EF, et al.	1997	Case-Control	3	36/30	N/A	N/A	N/A	SLE disease activity, Endogenous dyslipidemia.	N/A	N/A	SLE patients have a lipid profile abnormality which is aggravated by disease activity and may reside in a defect of VLDL metabolism. This pattern of dyslipoproteinemia may increase the risk of developing CAD.
[48]		Costallat LT, et al.	1997	Cross-sectional	4	55	N/A	N/A	N/A	N/A	N/A	Mortality due to CVD (13).	CVD was the second cause of death in Brazilian SLE patients.
[49]		da Rocha MC, et al.	2000	Cross-sectional	4	100	4	N/A	N/A	N/A	N/A	Hypertension (2), Thrombosis (4).	There was a high prevalence of CVD in Brazilian population with Lupus.
[50]		Travassos AC,et al.	2000	Cross-sectional	4	102	5.9	Dyslipidemia (5.9).	N/A	LAC (+).	N/A	Thrombosis (5.9).	The presence of aPL was not associated with abortion as thrombocytopenia when the total SLE population was retrospectively analyzed.
[51]		Falcao CA, et al.	2002	Case-Control	3	70/42	28.6	N/A	N/A	aPL and aCL (+).	N/A	Hypertension (28.6), CHF (2.86), MI, Stroke, DVT and/or PAD (17.1), LVD (19.7).	aPL antibodies (aCL) were significantly associated with CV events and showed an association with echocardiographic abnormalities in Brazilian patients with SLE.
[52]		Sella EM, et al.	2003	Cross-sectional	4	90	44	high TGL† 186 ± 88/113 ± 65, Castelli I† 5.5 ± 1/ 3.7 ± 1.4, Castelli II† 3.5 ± 1.5/2 ± 1.3, Hypertension (100/54), Menopausal status (87/31).	N/A	SLE CVD+/CVD-: SLEDAI† 11 ± 3/4 ± 3, SLICC† 4 ± 1/1 ± 1, Number of ACR criteria† 8 ± 1/6 ± 1.	N/A	IHD (33), CAD (23.3), Arrhytmia (9).	Lupus patients with abnormal myocardial scintigraphic findings and at least four risk factors for CAD had a higher risk of abnormal findings on coronary angiography.
[53]		Sella EM, et al.	2003	Cross-sectional	4	82	N/A	Obesity (19.5), Smoking (31.7), T2DM (6.1), Dyslipidemia (31.7), Hypertension (40.2), Postmenopausal status (28.05), Family history of CVD (14.6).	N/A	Vasculitis	N/A	Myocardial perfusion abnormalities (28).	Lower HDL cholesterol level and T2DM have a significant influence on abnormal myocardial perfusion in asymptomatic patients with SLE. Current vasculitis was associated with abnormal myocardial scintigraphy.
[54]		Soares M, et al.	2003	Cross-sectional	4	105	N/A	Male gender (8.6), Hypertension (41.9).	N/A	SDI<4/SDI>4: Poliautoimmunity (APS) (10.7/43.3), PDN use (88/100), MTP pulses (24/46.7).	N/A	CV damage (10.5).	The presence of APS was the major independent contributor to the development of severe organ damage in Brazilian lupus patients.
[55]		Cardoso CR, et al.	2005	Case-Control	3	140/37	51.4	BMI† 24.03 ± 4.39/26.23 ± 5.50.	N/A	N/A	N/A	Hypertension (51.4), Arrhytmias (35.7), ST abnormalities (17.1).	SLE patients have increased QT interval parameters when compared to controls. This prolongation may lead to an increased CV risk. This finding might be due to subclinical AT.
[56]		da Rocha MC, et al.	2005	Cross-sectional	4	520	1.15	N/A	N/A	N/A	N/A	Hypertension (50), PAD (1.5).	The ocurrence of arterial obstruction in larger blood vessels in SLE is not frequent.
[57]		Shinzato MM, et al.	2005	Cross-sectional	4	32	N/A	N/A	N/A	SLE CVD+/CVD-: Polyautoimmunity (APS) (52.3/47.6), high titers of C-fix aCL† 8 ± 5/2 ± 2.	N/A	Thrombosis	APS and the complement fixing activity of aCL antibodies seems to be relevant in venous events.
[58]		Souza AW, et al.	2005	Case-Control	3	82/62	50	Obesity† (36.5/33.3), high LDL (29.2/5.55), Age† 39.9 ± 11.4/45.6 ± 8.7.	N/A	SLE CVD+/CVD-: SLE per se 41/82 (50)-18/62 (29), SLE duration (m)† 102 ± 69.3/59.8 ± 58.5, SLICC† 2.1 ± 1.62/1.0 ± 1.24.	N/A	Hypertension (37.8), Vascular events: IHD, ACS, MI, Stroke, Angina or PAD: (13.4) AT (50).	Young patients with SLE present higher prevalence of carotid plaque that controls. SLE diagnosis was a significant risk factors for carotid plaque development.
[59]		Freire BF, et al.	2006	Cross-sectional	4	71	14.08	Advanced age† 42.7 ± 10.9/32.8 ± 12.5.	N/A	SLE CVD+/CVD-: SLE duration† (y) 10.8 ± 3.6/7.2 ± 4.2.	N/A	IHD (7.04), MI (4.22), Stroke (2.81).	Patients that presented CVD were older and presented longer disease duration.
[60]		Telles RW, et al.	2007	Cross-sectional	4	172	48.8	Dyslipidemia (40.7), high TGL (29.7), Menopausal status (37.8).	N/A	N/A	N/A	Hypertension (48.8), ACS (1.74), Stroke (1.74), PAD (2.9).	There is high prevalence of traditional risk factors for CVD in Brazilian SLE patients.
[61]		Cardoso CR, et al.	2008	Cohort	2	105	41.9	Male gender (8.57).	N/A	Organ damage (SDI).	N/A	Hypertension (41.9), MI (1.9), Stroke (0.95), PE (0.95).	Baseline and accrued damage increase mortality risk in Brazilian patients with SLE.
[62]		Cardoso CR, et al.	2008	Cross-sectional	4	185	48.6	Dyslipidemia: High TC (48.1), high LDL (43.8).	N/A	N/A	N/A	N/A	A high prevalence of dyslipoproteinemia and other unfavorable CV risk factors, including arterial hypertensión, were found in Brazilian lupus patients.
[63]		Telles RW, et al.	2008	Cross-sectional	4	172	9.3	Obesity (18.8/21.2), Smoking (37.5/10.9), T2DM (25/3.8), high TGL (56.3/26.9), Hypertension (87.5/44.9), Menopausal status (87.5/35.6), Family history of CVD (37.5/11.7), high Framingham risk score‡ 8.5 (5-13)/1 (1-3).	N/A	SLE CVD+/CVD-: SLE duration‡ (m) 133.5 (116-202)/90 (51.5-144), high SLICC 2‡ (1-3.5)/1 (0-2), GC‡ (m) 111 (88-174.5)/81 (47.5-136.5), high LDL (25)/(17.3).	N/A	Vascular events (4.7) -ACS, Stroke, PAD-, AT (9.3).	The develop of CVD related to atherosclerotic plaque were associted with traditional risk factors and SLE-characteristics.
[64]		Cadaval RA, et. al.	2009	Case-Control	3	80/60	56	BMI† 26.8 ± 6.2/24.9 ± 3.8, Smoking (27.5/18.3), Hypertension (56/33), High TGL† 159.3 ± 103.7/113.8 ± 50.3.	N/A	SLE CVD+/CVD-: Early age† (y) 38.3 ± 12.0/39.0 ± 12.7.	N/A	Hypertension (56).	Although SLE patients have a higher CV mortality rate, the risk of MI or 10-years mortality from CAD in SLE patients was similar to patients without the disease.
[65]		dos Santos F de M, et al.	2010	Cross-sectional	4	168	54.16	Overweight (55.7), Obese (68.8).	N/A	N/A	N/A	Hypertension (54.1).	Excess weight was high in this population and associated with some traditional risk factors for CVD and SLE poor prognosis.
[66]		Ribeiro GG, et al.	2010	Cross-sectional	4	94	12.7	Smoking (33.3), Dyslipidemia (58.3), Hypertension (66.6), Chronic renal insufficiency (8), Postmenopausal status (33.3), Family history of CVD (41.6).	N/A	SLE CAC+/CAC-: Disease duration† (y) 16.33 ± 5.09/12.46 ± 4.78.	BMD† (g/cm2) 0.974 ± 0.08/1.042 ± 0.08.	CAC (12.7).	Disease duration and decreased BMD are independent predictors for premature CAC in young women with SLE.
[67]		Shinjo SK, et al¥.	2010	Inception cohort	2	1.48	10.1	N/A	N/A	N/A	N/A	Thrombosis (2.3), CV complications (7.9).	AMs drugs were shown to have a protective effect, possibly in a time-dependent manner, on SLE survival.
[68]		Telles RW, et al.	2010	Cross-sectional	4	162	N/A	MetS (32.1), Obesity (21.6), Smoking (13.6), T2DM (15.4), Dyslipidemia (45.1), Hypertension (86.5), Postmenopausal status (40.7), Family history of CVD (13.8).	N/A	SLE MetS+/MetS-: Damage Index‡ SLICC vs. ACR 2 (1-4) vs. 1 (0-2), Nephrotic proteinuria (34.6/15.5).	N/A	CHD	MetS were associated with traditional risk factors for CHD and lupus characteristics, including damage Index and renal involvement.
[69]		Lozovoy MA, et al.	2011	Case-Control	3	58/105	N/A	MetS (41.4), Smoking (8.6).	N/A	SLE MetS-/MetS+: CRP‡ (mg/dL) 1.09 (0.62-5.3)/3.1 (1.56-7.35).	N/A	N/A	SLE patients have a high prevalence of MetS that directly contributes to increase inflammatory status and oxidative stress. SLEDAI scores were positively correlated with BMI and WC.
[42]		Signorelli FV, et al¶.	2011	Cohort	2	176	28.4	N/A	N/A	APS 4.8 and 4.7 fold excess CVD and mortality risk.	N/A	Thrombosis (28.4).	APS had high impact in CVD and survival in Brazilian lupus patients.
[70]		Souza DC, et al.	2012	Cross-sectional	4	4.815	N/A	N/A	N/A	N/A	N/A	Causes of death: Hypertensive diseases, MI, Stroke, CHF, and PE.	The vigorous treatment of CV comorbidities is crucial to the successful management of SLE and to improving survival of lupus patients.
[71]		de Miranda Moura Dos Santos F, et al.	2013	Cross-sectional	4	170	N/A	T2DM (7.6), Hypertension (53.5), Age ≥ 40 years (54.1).	N/A	N/S	N/A	N/A	Patients with SLE who have excess weight present distinct clinical-laboratory, socio-demographic and treatment characteristics when compared to normal weight patients.
[96]	Chile	Abumohor P, et al.	1991	Cross-sectional	4	161	12.4	N/A	N/A	aCL +/- (18.36/3.77).	N/A	Thrombosis (12.42).	aCL antibodies was associated with thrombotic events, mainly in high titers in Chilean SLE patients.
[95]	Colombia	Yassin LM, et al.	2011	Case-Control	3	38	56	N/A	N/A	Endogenous dyslipidemia in SLE CVD+/CVD-: HDL† 43 ± 17/61 ± 6, TGL† 248 ± 177/86 ± 12.	CD163 expression† 32 ± 18/67.5 ± 17.8.	AT (56).	SLE patients presented decreased HDL levels and increased TGL levels. ox-LDL binding/endocytosis was similar to their controls and hence cannot explain the increased cIMT observed in a high percentage of SLE patients. The decreased expression of CD163 could be explained by statins treatment and the inflammatory state.
[72]	Mexico	Gobaira Maluf J, et al.	1982	Cross-sectional	4	32	38	N/A	N/A	N/A	N/A	Hypertension (38), Arrhytmias (16), CHF (38).	There were high frequency of electrical alterations and CVD in Brazilian lupic patients.
[73]		Badui E, et al.	1985	Cross-sectional	4	100	74	Hypertension (22).	N/A	Steroids, Vasculitis.	N/A	Hypertension (22), IHD (16), Stroke (3), CHF (10).	IHD was observed in two types of patients: those with long term steroid therapy, and those with frank episodes of vasculitis.
[74]		Ruíz-Argüelles GJ, et al.	1991	Cross-sectional	4	108	35.18	N/A	N/A	Polyautoimmunity (APS), aCL IgG.	C4 binding protein, functional protein C and increased antithrombin III.	Arterial thrombotic events (6.4), Venous thombotic events (27.7), Both arterial and venous events (1).	Low levels of C4 binding protein, functional protein C, and high levels of antithrombin III were associated with venous thrombotic events in Mexican patients with SLE.
[43]		Cabiedes J, et al ¶.	1995	Cross-sectional	4	94	N/A	N/A	N/A	Polyautoimmunity (APS), aPL, aCL, and anti-β2GPI antibodies.	N/A	Vascular events.	SLE associated with APS and some autoantibodies (aPL, aCL, and anti-β2GPI) presented higher prevalence of vascular events more than SLE patients without polyautoimmunity.
[75]		Salazar-Paramo M, et al.	1996	Cross-sectional	4	43	18	N/A	N/A	Antibody reactivity against fibrin-bound t-PA 11/43 (26).	N/A	Thrombosis (18).	Autoantibodies to fibrin-bound t-PA could play a role in the pathogenesis of vascular disease in some SLE patients.
[76]		Zonana-Nacach A, et al.	1998	Cross-sectional	4	210	9.05	Male gender (6).	N/A	aCL (+) (61).	N/A	PAD (9.05).	Mexican patients had more peripheral vascular and gonadal involvement compared with published data from non-Hispanic SLE populations.
[77]		Gómez-Pachecho L, et al.	1999	Case-Control	3	24/102	N/A	N/A	N/A	anti-Β2GPI and aCL (+).	N/A	Thrombosis (all cases).	anti-β2GPI antibodies was strongly associated with thrombosis in SLE patients. The decrease of anti-β2GPI levels at the time of thrombosis may indicate a pathogenic role.
[78]		Salcido-Ochoa F, et al.	2002	Case-Control	3	466/38	5.2	N/A	N/A	SLE CVD+/CVD-: Polyautoimmunity (APS) (22/9), aPT: IgG (20/6), IgM (33/5), any subtype (46/9).	N/A	Thrombosis (5.15).	The higher frequency of aPT found in patients with APS, SLE with thrombosis, or polyautoimunity (APS) may suggest concerted pathogenic actions with other autoantibodies in the development of thrombotic events.
[79]		Juarez-Rojas JG, et al.	2008	Case-Control	3	30/18	N/A	N/A	N/A	Endogenous dyslipidemia: HDL2b (−14.7), HDL3b (+8.8) and HDL3c (+23.3).	N/A	N/A	HDL distribution and composition are abnormal in non-complicated Mexican SLE patients.
[81]		Zonana-Nacach A, et al.	2008	Cross-sectional	4	192 (107 RA, and 85 SLE patients)	24.5	MetS (18.7), Obesity (25.5), Smoking (14.6), T2DM (7.3), Dyslipidemia (25.5), Sedentary lifestyle (87).	N/A	MetS- (n = 158)/MetS+ (n = 34), N/S.	Education† (y) 8.9 ± 4.6/7 ± 3.2, monthly income† (USD) 618 ± 574/489 ± 310.	Hypertension (24.5).	MetS in RA and SLE patients was similar and associated with smoking. A low education and monthly income were associated with MetS in lupus Mexican patients.
[80]		Romero-Díaz J, et al.	2009	Cohort	2	241	20.3	Smoking (30), T2DM (5), Dyslipidemia (69), Male gender (12), Hypertension (36).	N/A	Disease activity, vasculitis.	N/A	Thrombosis (20.3).	Patients with SLE are at increased risk of thrombosis. This risk remains elevated throughout the course of the disease.
[82]		Uribe AG, et al.	2009	Case-Control	3	164 (70 Mexicans, 94 Texan)	14.02	N/A	N/A	N/A	N/A	Arterial/Venous thrombosis (14.02).	Texan patients had more severe disease than the Mexican patients. Texan Hispanic ethnicity was significantly associated with high SLE activity, but significance was not reached for damage including CVD.
[83]		Alexanderson E, et al.	2010	Case-Control	3	16/16	N/A	High glucose level† 87.2 ± 4.9, TC† 130.1 ± 20.6, LDL† 67.1 ± 22.2.	N/A	N/A	N/A	MFR LES/MFR control† 2.41 ± 0.59/2.73 ± 0.77, CPT LES/CPT control†: 1.16 ± 0.48/1.94 ± 1.15.	Mexican SLE patients present abnormal coronary flow and endothelial dysfunction more than healthy controls.
[84]		Romero-Díaz J, et al.	2012	Nested Case-Control	2	139/100	7.2	Smoking (9), T2DM (4), Dyslipidemia, Male gender (7), Hypertension (29), Postmenopausal status (3), Family history of MI (4), Hyperhomocysteinemia.	N/A	Disease duration† (y) 5.5 ± 2.9, SLEDAI-2K 4.5 ± 4.8.	N/S	CAC (7.2).	Disease duration and activity are predictors of CAC in SLE patients.
[91]	Puerto Rico	Vila LM, et al.	1999	Cross-sectional	4	134	5.97	N/A	N/A	N/A	N/A	Stroke (85.2), Thrombosis (0.74).	Puerto Ricans with SLE present a mild form of disease predominantly manifested by cutaneous, musculoskeletal and hematologic involvement, with low prevalence of CVD.
[92]		Rodríguez VE, et al.	2006	Cross-sectional	4	236	31.3	N/A	N/A	aCL and RP+/aCL and RP- (36.5/17.4).	N/A	Hypertension (31.3), Arterial thrombosis (7.62), Venous thrombosis (9.74).	Patients with both RP and aCL positive antibodies seem to be at increased risk for thrombotic events.
[93]		Fernández M, et al.	2007	Cohort	2	72	29.1	Smoking (13.8), Family history of CVD (38.8).	N/A	N/S	N/A	Vascular arterial events (18), Venous thrombotic events (11.1).	HRT use was not associated with the occurrence of vascular arterial events in the LUMINA patients. HRT use in women with SLE may be safe if aPL antibodies are not present or vascular arterial events have not previously occurred.
[94]		Negrón AM, et al.	2008	Cross-sectional	4	204	N/A	MetS (38.2).	N/A	SLE MetS-/MetS+: SLAM-R score† 5.7 ± 3.0/4.6 ± 2.6, ESR, PDN >10mg/day (91/74.6).	N/A	N/A	Increased ESR, higher disease activity, and PDN were independently associated with MetS in Puerto Ricans patients with SLE.
[17]	USA	Toloza SM, et al€.	2004	Cohort	2	546	6.2	Morbid obesity (15.3), Smoking (13.6), T2DM (2.7), Male gender (10.4), Hypertension (34.6), Sedentary lifestyle (59), Family history of CVD (3.7).	N/A	Vascular events +/-: aPL (29.4/12.1), CRP+ (12.6/4.8).	N/A	Vascular event 34/546 (6.2): 13 MI, 18 Stroke, 5 Peripheral vascular events.	The independent predictors of vascular events were older age, current smoking status, longer follow-up time, elevated serum levels of CRP, and the presence of any aPL antibody.
[85]		Toloza SM, et al€.	2004	Cohort	2	158	3.8	Smoking (6.9), Male gender (38.6).	N/A	N/S	N/A	CV events 6/158 (3.8).	One of the independent predictors of a shorter time to initial damage were the occurrence of thrombotic events in visceral and/or peripheral veins or arteries.
[18]		Ho KT, et al€.	2005	Cohort	2	442 (135 Hispanics)	10.4	Smoking	N/A	SLE activity (SLAM).	N/A	Thrombosis 46/442 (10.4).	Smoking and disease activity emerged as important determinants in the occurrence of thrombotic (central and/or peripheral, arterial and/or venous) events.
[86]		Szalai AJ, et al€.	2005	Nested Case-Control	2	546 (25/32)	4.5	Smoking	CRP GT20	N/S	N/A	Vascular arterial events 25 (4.5): MI, angina, CAD, Stroke, thrombosis.	SLE patients carrying the GT20 allele are more likely to develop vascular arterial events.
[16]		Pons-Estel GJ, et al€.	2009	Cohort	2	637	6.8	T2DM (4.7), Male gender (9.1), Advanced age.	N/A	CV Damage Yes/No: SDI† 3.9 ± 2.5/1.6 ± 2.0, CRP (tertiles).	Education (years).	Hypertension (81.4), Angina (23.3), Stroke (2.3), CHF (51.2), Venous Thrombosis (14).	Atherosclerotic CV damage in SLE is multifactorial, traditional (age, gender) and disease-related factors (CRP levels, SDI at baseline) appear to be important contributors to such an occurrence.
[87]		Kaiser R, et al.	2012	Cohort	2	1,698 (15% Hispanics)	23	N/A	FGG rs2066865	N/A	N/A	Thrombosis (23).	A SNP in FGG rs2066865 demonstrated association with arterial thrombosis risk in Hispanics Americans with lupus.
	Table 1. Prevalence, Risk factors, and Subphenotypes of Cardiovascular Disease in Latin American patients with Systemic Lupus Erythematosus. aCL: Anticardiolipins antibodies; ACR: American College of Rheumatology; ACS: Acute Coronary Syndrome; AMs: antimalarials; anti-β2GPI: Anti beta2 glycoprotein 1; aPT: Anti-prothrombin antibodies; aPL: Anti-phospholipid antibodies; APS: Antiphospholipid Syndr…
